# Supplementary material for: A collection of bacterial isolates from the pig intestine reveals functional and taxonomic diversity
Source: PubMed Central journal article supplement (PMC7738495; doi:10.1038/s41467-020-19929-w), 2020-12-15
Supplement: 41467_2020_19929_MOESM2_ESM.pdf [file 41467_2020_19929_MOESM2_ESM.pdf]

Editorial Note: This manuscript has been previously reviewed at another journal that is not operating a transparent peer review scheme. The manuscript was considered suitable for publication without further review at Nature Communications.
