# Supplementary material for: A collection of bacterial isolates from the pig intestine reveals functional and taxonomic diversity
Source: PubMed Central journal article supplement (PMC7738495; doi:10.1038/s41467-020-19929-w), 2020-12-15
Supplement: 41467_2020_19929_MOESM3_ESM.pdf [file 41467_2020_19929_MOESM3_ESM.pdf]

## Description of Additional Supplementary Files

File Name: Supplementary Data 1

Description: Detailed PiBAC strain information

File Name: Supplementary Data 2

Description: Novel taxa with PiBAC against metagenome-reconstructed genomes

File Name: Supplementary Data 3

Description: Genomic and transcriptomic data of *C. scindens* DSM 100975
